# Supplementary material for: High-Sensitivity AlN-Based Surface Acoustic Wave Strain Sensor with Strain–Temperature Decoupling Method
Source: Research Square preprint supplement (doi:10.21203/rs.3.rs-6861864/v1), 2025-06-27
Supplement: Supplementary file 1 [file ee2ad414c77b7dac6325c02b.docx]

Supporting Information

**High-Sensitivity AlN-Based Surface Acoustic Wave Strain Sensor with Strain–Temperature Decoupling Method**

Yuanhang Qu1,3, Xiang Chen1,3, Yan Liu2,5*, Shengxiang Wang2, Zhiwei Wen1,3, Jiaqi Ding4, Xiyu Gu4, Yao Cai1,3,5, Guoqiang Wu1* and Chengliang Sun1,3,5*

1 The Institute of Technological Sciences, Wuhan University, Wuhan, China

2 State Key Laboratory of New Textile Materials and Advanced Processing Technologies, Wuhan Textile University, Wuhan 430200, PR China

3 School of Microelectronics, Wuhan University, Wuhan 430072, China

4 Key Laboratory of Artificial Micro, and Nano-structures of Ministry of Education, School of Physics and Technology, Wuhan University, Wuhan, China

5 Hubei Key Laboratory of Electronic Manufacturing and Packaging Integration, Wuhan University, Wuhan, China

These authors contributed equally: Yuanhang Qu, Xiang Chen

**Supplementary Table S1. Parameters of AlN, Mo and Si used for in the calculations.**

| **Material** | **Density (kg/m3)** | **2nd Elastic constant (GPa)** | **3rd Elastic constant(GPa)** | **First-order temperature coefficient of elastic constants, Tcij (10-6/K-1)** | **Second-order temperature coefficient of elastic constants, Tcij (10-6/K-1)** |
| --- | --- | --- | --- | --- | --- |
| **AlN** | 3300 | c11=410  c12=149  c13=99  c33=389  c44=125  c66=130.5 | c111 =-3177 c112 = -432 c113 = -248  c123 = -465 c133 = -1097 c144 = -149  c155 = -32 c222 = -2355 c333 = -1024  c344 = -724 | Tc11=-10.65  Tc12=-11.67  Tc13=-11.22  Tc33=-11.13  Tc44=-10.82  Tc66=10.80 | T2c11=-20.61  T2c12=-19.51  T2c13=-19.88  T2c33=-20.03  T2c44=-20.36  T2c66=-20.39 |
| **Si** | 2329 | c11=217.3  c12=84.5  c44=66.4 | c111 =-825  c112 = -451 c123 = -64  c144 = 12  c166 = -310  c456 = -64 | -63 | -52 |
| **Mo** | 10200 | c11=432.5  c12=194.3  c44=119.1 |  | -117 | -24.9 |
| **Material** | **Piezoelectric constant (C/m2)** | | | **Dielectric constant** | |
| **AlN** | e31 = e32 = -0.58 e33 = 1.55 e24 = e15 = -0.48 | | | 9 | |

Ref. [1-4]

**Supplementary Table S2**. Dimensional parameters of the SAW resonator structure used in the COMSOL simulation.

| **Mo** | **AlN** | **Seed AlN** | **Si** | **PML** |
| --- | --- | --- | --- | --- |
| 200 nm | 1 µm | 25 nm | 100 µm | 10 µm |

**Details of simulation in COMSOL model**

The simulation of the SAW strain sensor involves a multiphysics problem coupling the piezoelectric and mechanical fields. The overall simulation workflow is shown in Figure. S1. The system is divided into two parts: the constant-strain cantilever structure and the SAW resonator structure. These two components are coupled through prestress and prestrain. First, a steady-state mechanical simulation is performed on the constant-strain cantilever to obtain the average strain and stress in each layer of the SAW resonator’s multilayer structure. The obtained stress and strain are then applied to the SAW resonator model as prestress/prestrain conditions. Next, based on the stress-strain relationship and third-order elastic constants, the nonlinear properties of the material under the applied strain, including variations in density and elastic stiffness matrix, are calculated using a MATLAB program. The modified material parameters are then imported into COMSOL. Finally, a frequency-domain prestressed simulation is performed in COMSOL to obtain the resonant frequency and admittance response of the SAW resonator.

**Figure S1 Nonlinear material simulation process in COMSOL.**

**Figure S2 Strain distribution of an equal strain cantilever beam with different substrate thicknesses.**

Figure. S3 (a) and (b) illustrates the mode shapes of SAW devices under different structural parameters, including variations in piezoelectric layer thickness and trench ratio. As shown, despite changes in structural parameters, the displacement distribution remains largely consistent, exhibiting a typical Rayleigh wave mode. Figure. S2 (c) further presents the simulated impedance response of the device, which shows good agreement with the measured resonant frequency. No spurious modes are observed within the simulated frequency range, indicating that the device operates in a pure Rayleigh mode.

**Figure S3. The modes of the SAW resonator under different structural parameters, (a) AlN thickness; (b) Groove ratio; (c) The simulated impedance characteristic curve and the corresponding displacement distribution at the resonant frequency.**

**Reference**

1. Chen, S. & You, Z. Prediction of the Strain Response of Poly-AlN/(100)Si Surface Acoustic Wave Resonator and Experimental Analysis. Sensors 16, 603 (2016).
2. Zhou, J. et al. Strategy to minimize bending strain interference for flexible acoustic wave sensing platform. npj Flexible Electronics 6, 84 (2022).
3. Lepkowski, S.P. and A.R. Anwar, Third-order elastic constants and biaxial relaxation coefficient in wurtzite group-III nitrides by hybrid-density functional theory calculations. J Phys Condens Matter 33, 355402 (2021)
4. Kropelnicki, P. et al. CMOS-compatible ruggedized high-temperature Lamb wave pressure sensor. Journal of Micromechanics Microengineering 23, 085018 (2013).
5. Kuang, L., Zhou, J., Guo, Y., Duan, H. & Fu, Y. Q. Versatile and effective design platform for surface acoustic wave accelerometers. Physica Scripta 98, 085408, doi:10.1088/1402-4896/ace8cd (2023).
6. 1 Zhao, Y. et al. Equal-strength beam design of acoustic wave accelerometers. Physica Scripta 98, 125205, doi:10.1088/1402-4896/ad0582 (2023).
